# Supplementary material for: Snapshot imprinting as a tool for surface mapping and identification of novel biomarkers of senescent cells
Source: Royal Society of Chemistry journal article supplement (doi:10.1039/d2na00424k), 2022-01-01
Supplement: d2na00424k1.pdf [file d2na00424k1.pdf]

## Supplementary information

**Table 1.** Proteins identified in this work using snapshot imprinting

| Accession                                                              | Description                                                    | Senescent cells,<br>fmol | Control cells,<br>fmol |
|------------------------------------------------------------------------|----------------------------------------------------------------|--------------------------|------------------------|
| A0A173GMX0;A4UCT3                                                      | Actin alpha cardiac muscle 1                                   | 206±89                   | 485±98                 |
| P62736                                                                 | Actin aortic smooth muscle                                     | 2104±297                 | 4019±169               |
| P60709;P63261;Q1KLZ0;Q53G76;Q53GK6;B4D<br>VQ0;B4E335;B4E3A4;<br>Q53G99 | Actin cytoplasmic                                              | 1661±291                 | 10618±499              |
| P53999;Q59G24;Q6IBA2;B7Z1Z0;Q6E433                                     | Activated RNA polymerase II transcriptional coactivator<br>p15 | 735±56                   | 6912±486               |
| P13798;A0A024R2U9;C9JIF9;H7C393;C9JLK2;F<br>8WEH5;H7C1U0               | Acylamino-acid-releasing enzyme                                | 44.4±30.6                | 2198±264               |
| P05141;P12236;Q59EI9; A0A0S2Z3H3                                       | ADP/ATP translocase 2                                          | 2070±681                 | 3553±136               |
| Q9Y2Y0                                                                 | ADP-ribosylation factor-like protein 2-binding protein         | 87±1.6                   | 80±21                  |
| A0A1P7ZIN0;A8MQ02;E9PFY5;F8W9I4;G1UI2<br>2;J3KN01;P55196;Q5TIG5        | L-afadin                                                       | 168.2±53                 | 959±75                 |
| P00330                                                                 | Alcohol dehydrogenase 1                                        | 133±2.6                  | 67.3±32.3              |
| A0A024R4F1;A4UCS8;E2DRY6;<br>K7EM90;P06733                             | Alpha-enolase                                                  | 654±486                  | 2046±199               |
| L8EAQ2                                                                 | Alternative protein RIMS3                                      | 91±108                   | 1323±175               |
| A0A024R5Z7;B4DNH8;H0YKL9;H0YKS4;H0Y                                    | Annexin                                                        | 57±16.7                  | 909±44                 |

|                                                              |                                                      |          |          |
|--------------------------------------------------------------|------------------------------------------------------|----------|----------|
| KV8;H0YKX9;H0YKZ7                                            |                                                      |          |          |
| P25705;V9HW26;B4DGW3;K7EK77;K7ERX7;K7EJP1;K7EQH4;K7ENJ4      | ATP synthase subunit alpha mitochondrial             | 203±248  | 1979±111 |
| P06576;Q0QEN7;V9HW31;H0YH81;F8W0P7                           | ATP synthase subunit beta mitochondrial              | 170±20   | 5867±448 |
| P56385                                                       | ATP synthase subunit e mitochondrial                 | 1057±94  | 7302±785 |
| P48047                                                       | ATP synthase subunit O mitochondrial                 | 23±32    | 806±179  |
| A0A024R5H0;O75531                                            | Barrier to autointegration factor 1 isoform CRA a    | 219±170  | 5600±862 |
| P38398;A0A024R1V8;A0A024R1W0;A0A024R1Y0;A0A024R1Y1;G8I0D8... | Breast cancer type 1 susceptibility protein          | 747±35   | 994±137  |
| A8MX76;B7Z467;D6W573                                         | Calpain-14                                           | 364±7.1  | 410±7    |
| B4DHR1;B4E2Y9;K7EJB9;P27797;Q53G71;V9HW88                    | Calreticulin                                         | 0.0      | 728±101  |
| P0DMU7;P0DMU8;P0DMU9;P0DMV0;P0DMV1;P0DMV2                    | Cancer/testis antigen family 45-member A6            | 290±81   | 840±23   |
| Q8N299;Q96Q07                                                | cDNA FLJ33611 fis clone BRAMY2016002                 | 129±12   | 128±91   |
| B4DMC6;B4DPU3;B4DRE8;P13639                                  | cDNA FLJ60696_ highly similar to Elongation factor 2 | 2688±285 | 2814±133 |
| Q9NX34                                                       | cDNA FLJ20465 fis clone KAT06236                     | 173±60   | 3211±562 |
| B2R6V2;B7Z5H7;O00311;Q6JSD6                                  | Cell division cycle 7-related protein kinase         | 5721±234 | 0.00     |
| P49454                                                       | Centromere protein F                                 | 225±11   | 177±18   |
| A8K4M4;H0YKH6;Q5SZE1;Q5SZE2;Q5SZE3;Q5SZE4;Q96G23             | Ceramide synthase                                    | 1273±95  | 2813±131 |
| A0A140T8X2;A0A182DWE8;Q6ZTR5                                 | Cilia- and flagella-associated protein 47            | 20.5±2.3 | 59±1.8   |
| A8TX70;E9PAL5                                                | Collagen alpha-5(VI) chain                           | 47±1.6   | 35±1     |

|                                                             |                                                                    |             |            |
|-------------------------------------------------------------|--------------------------------------------------------------------|-------------|------------|
| P19876                                                      | C-X-C motif chemokine 3                                            | 33±2        | 35±2       |
| Q9NZV1                                                      | Cysteine-rich motor neuron 1 protein                               | 25±0.7      | 5.6±3.2    |
| F8VUJ9                                                      | Dynamin-1-like protein                                             | 177±169     | 930±166    |
| Q15075                                                      | Early endosome antigen 1                                           | 88.5±3.9    | 106±26     |
| A0A087WVQ9;A8K9C4;B4DNE0;P68104;Q53G85;Q53G89;Q53GE9;Q53HM9 | Elongation factor 1-alpha                                          | 1870±549    | 12420±686  |
| P57679                                                      | Ellis-van Creveld syndrome protein                                 | 321±42      | 685±17     |
| P14625;Q5CAQ5;V9HWP2;B4DHT9;B4DU71;Q59FC6                   | Endoplasmic reticulum resident protein 29                          | 81±31       | 1008±51.5  |
| F8VY02;P30040;V9HW71                                        | Endoplasmic reticulum resident protein 29                          | 2.4±3.4     | 882±86     |
| B2R6J2;B7Z437;B7Z5V2;E7EQR4;J7M2B1;P15311;Q6NUR7            | Ezrin                                                              | 81±115      | 1059±139   |
| Q92915                                                      | Fibroblast growth factor 14                                        | 40±0.6      | 23±16      |
| H3BMQ8;H3BPS8;H3BQN4;H3BR04;H3BUH7;J3KPS3;P04075;V9HWN7     | Fructose-bisphosphate aldolase A                                   | 231±29      | 1257±103   |
| P11021;V9HWP4;B4DEF7                                        | 78 kDa glucose-regulated protein                                   | 320±246     | 8973±1091  |
| P04406;V9HVZ4;E7EUT5;Q2TSD0;Q0QET;A4UCT1;B4DRV9;Q5ZEY3      | Glyceraldehyde-3-phosphate dehydrogenase                           | 144±193     | 13580±1359 |
| Q14789;E7EU81                                               | Golgin subfamily B member 1                                        | 73±2        | 56±25      |
| Q9UBI6                                                      | Guanine nucleotide-binding protein G(I)/G(S)/G(O) subunit gamma-12 | 382±279     | 1364±66    |
| P61604;B8ZZL8;Q9UNM1;S4R3N1;A0A024R3X7;B8ZZ54               | 10 kDa heat shock protein_mitochondrial                            | 810.4±182.5 | 24979±608  |
| P10809;A0A024R3X4;B3GQS7;B7Z597;B7Z5E7;                     | 60 kDa heat shock protein_mitochondrial                            | 845±1106    | 21306±1747 |

|                                                                  |                                                                               |            |            |
|------------------------------------------------------------------|-------------------------------------------------------------------------------|------------|------------|
| E7ESH4                                                           |                                                                               |            |            |
| A0A024RD80;B4DGL0;B4DMA2;P08238;<br>A0A140VJY2                   | Heat shock protein 90kDa alpha (Cytosolic)_ class B<br>member 1 isoform CRA_a | 62±14      | 644±39     |
| A0A024R228;B3KU16;B4DFF1;B4DUQ1;P6197<br>8                       | Heterogeneous nuclear ribonucleoprotein K_<br>isoform<br>CRA_d                | 48±3       | 767±99     |
| A0A087X0X3;M0R2I7;P52272;Q59ES8                                  | Heterogeneous nuclear ribonucleoprotein M                                     | 7990±1630  | 9485±327   |
| A0A024R017;P04908;Q08AJ9;Q7L7L0;Q93077;<br>A0A024RAS2;A0A0U1RR32 | Histone H2A                                                                   | 235.5±23.8 | 7038±854   |
| A0A024QZZ7;A0A024RCJ9;A0A024RCL8;A8K<br>9J7;B2R4S9               | Histone H2B                                                                   | 694±145    | 4949±401   |
| P33778;A0A024RCJ2;P06899;P23527;Q16778;Q<br>8N257;Q96A08;L0R4T3  | Histone H2B type 1-B                                                          | 1855±389   | 13236±1072 |
| Q16695;B2R4P9;B4E380;K7EK07;P68431;P8424<br>3;Q71DI3             | Histone H3.1t                                                                 | 10222±30   | 27054±2103 |
| P62805;B2R4R0;Q0VAS5;Q6B823                                      | Histone H4                                                                    | 4911±428   | 18839±1452 |
| C9JPEAK5;E7EQW5;E7ERX5;E7EUI6;<br>E9PLR6;P05556;Q5T3E6           | Integrin beta-1                                                               | 562±4      | 5751±1057  |
| P33176;A8K048;C1PHA2; M1VE89                                     | Kinesin-1 heavy chain                                                         | 119±10     | 70.5±49    |
| P00338;V9HWP9;B4DJI1;F5GXH2;F5GXY2;F5<br>GYU2;F5H5J4;F5H6W8      | L-lactate dehydrogenase A chain                                               | 913±585    | 6347±553   |
| Q13751;A0A0S2Z3R6                                                | Laminin subunit beta-3                                                        | 101±0.5    | 95±4       |
| P48449;B2R694;C9J315                                             | Lanosterol synthase                                                           | 336±40.5   | 1177±124   |
| E9PIC3                                                           | Large neutral amino acids transporter small subunit 2                         | 94.9±3.3   | 53.6±4.1   |
| I3VM53;I3VM54;Q9Y2K7                                             | Lysine-specific demethylase 2A                                                | 77±12      | 57±21      |

|                                                          |                                                      |           |           |
|----------------------------------------------------------|------------------------------------------------------|-----------|-----------|
| A0A024R4K3;P40926;Q0QF37;Q6FHZ0;Q75MT9;B3KTM1;G3XAL0     | Malate dehydrogenase                                 | 298±88    | 3926±613  |
| A0A023VT86;A0A061CLB2;A0A075M4J2;A0A090KNI9;A0A090KQC9   | MHC class II antigen                                 | 240±21    | 234±12    |
| P35749;A0A024QZJ4;A0A024QZJ6;A0A024R1N1;A0A0U4BW16       | Myosin-11                                            | 862±509   | 3710±330  |
| A0A024R592;B4DJ30;B4DSM6;F5H6X6;Q14697                   | Neutral alpha-glucosidase AB                         | 66.7±35.8 | 2035±261  |
| A0A0A0MTJ9;A0A0R4J2G3;Q6PIU2                             | Neutral cholesterol ester hydrolase 1                | 486±616   | 6692±1521 |
| Q96J73                                                   | NNP3                                                 | 265±1.3   | 255±22.7  |
| P06748;A0A0S2Z491;A0A0S2Z4G7;Q9BTI9                      | Nucleophosmin                                        | 9.9±2.7   | 2669±460  |
| A0A087WYL6; A0A087WZG6;A0A087X1S9; Q587I4; Q8TEW8        | Partitioning defective 3 homolog B                   | 6748±735  | 27±16     |
| A8K486;B2RE56;B4DM82;P62937;Q71V99;V9HWF5                | Peptidyl-prolyl cis-trans isomerase                  | 250±46    | 2526±282  |
| P23284;V9HWC6                                            | Peptidyl-prolyl cis-trans isomerase B                | 483±20    | 3179±277  |
| A0A075B759;A0A075B767;A0A0B4J2A2;P0DN26;P0DN37;Q9Y536    | Peptidyl-prolyl cis-trans isomerase A-like 4E        | 53.5±3    | 43.4±1.5  |
| A0A024RDS2;A0A024RDT5;B1ALD9;C0IMJ3;Q15063;B7Z6G1        | Periostin_ osteoblast specific factor_ isoform CRA_c | 483±54.5  | 2301±86.6 |
| A0A0A0MSI0;B2R4P2;Q06830;A0A0A0MRQ5;B4DF70;P32119;V9HW12 | Peroxiredoxin-1                                      | 293±33    | 1185±116  |
| Q86YQ7                                                   | Phospholipase D2                                     | 164±85    | 1396±124  |
| A8K964;B4DTD4;B4E392;Q9H307                              | Pinin                                                | 3.8±5.3   | 6634±996  |
| P07737;I3L3D5;K7EJ44                                     | Profilin-1                                           | 72±39     | 2504±80   |

|                                                      |                                                                   |           |            |
|------------------------------------------------------|-------------------------------------------------------------------|-----------|------------|
| B2RDG0;H0YL69;H0YLC2;H0YLS6;<br>H0YMA1               | Proteasome subunit alpha type                                     | 3802±492  | 2315±82    |
| P49721;A0A140VJS6;B7Z478;Q59FJ0                      | Proteasome subunit beta type-2                                    | 2176±235  | 12851±1254 |
| H0YJM8;P28074                                        | Proteasome subunit beta type-5                                    | 853±542   | 996±79     |
| Q9P219;G3V3S0                                        | Protein Daple                                                     | 2186±149  | 15027±1381 |
| B3KQT9;P30101;V9HVV3;B3KQT2;B4DDM1;B<br>4DJ98;H7BZJ3 | Protein disulfide-isomerase                                       | 130±7.5   | 3369±333   |
| A0A024R7F1;A0A0S2Z4A0;A0A0S2Z4D8;A0A0<br>S2Z4W7      | Protein kinase C substrate 80K-H_ isoform CRA_a                   | 158±21    | 1026±160   |
| Q9H397                                               | PRO2852                                                           | 23±5.6    | 854±85     |
| Q6P158;A0A087WZ11;B4DKW2                             | Putative ATP-dependent RNA helicase DHX57                         | 11675±660 | 2150±238   |
| P0C7P4;P47985                                        | Putative cytochrome b-c1 complex subunit Rieske-like<br>protein 1 | 1655±1229 | 1681±174   |
| A8K6R4;C9JNL8;Q3MIT2                                 | Putative tRNA pseudouridine synthase Pus10                        | 1.6±2.3   | 1089±118   |
| Q2TAK8;A0A0D9SGJ8;D6W5Y8;J3KNX4;K7EP<br>97;K7ES53    | PWWP domain-containing protein MUM1                               | 1020±167  | 2139±129   |
| Q9UL26                                               | Ras-related protein Rab-22A                                       | 80±5.9    | 69±9.4     |
| D3DS95;P30050;Q59FI9                                 | 60S ribosomal protein L12                                         | 12.1±17.1 | 1144±233   |
| A0A024RAE1;Q9UKD2                                    | Ribosome assembly factor mrt4                                     | 397±52    | 2070±125   |
| H7C2F9;Q15032;Q53SQ1;B4DLH6;C9JIX1;Q9B<br>VG5        | R3H domain-containing protein 1                                   | 170±23    | 110±8.5    |
| H7BZW9;H7C3M8;H7C5G9; Q14BN4                         | Sarcolemmal membrane-associated protein                           | 195±20    | 171±7.3    |
| D6RDG7;D6RFI0;Q9H9B4;S4R2X2;D6RAE9;H0<br>Y9J5        | Sideroflexin-1                                                    | 76.2±51   | 1112±44    |

|                                                                |                                                                       |           |          |
|----------------------------------------------------------------|-----------------------------------------------------------------------|-----------|----------|
| A0A0G2JLD8;A4D1U3;B7Z268;C9K0U8;E7EUY5;Q04837;Q567R6           | Single-stranded DNA-binding protein mitochondrial                     | 96±73     | 1242±238 |
| A4D1U3;Q04837;Q567R6;A0A0G2JLD8;B7Z268;C9K0U8;E7EUY5           | Single-stranded DNA binding protein 1                                 | 2854±747  | 5942±289 |
| Q9UKG4;V9GYC7; V9GZ66                                          | Solute carrier family 13 member 4                                     | 148±24    | 115±5.6  |
| Q59G27                                                         | Stathmin                                                              | 132±132   | 2456±114 |
| B7Z1V7;B7Z4V2;P38646;Q8N1C8;V9HW84;D6RJI2;B7Z4T3;D6RA73;Q2F839 | Stress-70 protein_ mitochondrial                                      | 1821±269  | 3604±145 |
| H3BR38;I3L2E7                                                  | Target of rapamycin complex subunit LST8                              | 2128±896  | 1176±118 |
| H3BR71;Q15572                                                  | TATA box-binding protein-associated factor RNA polymerase I subunit C | 79±12     | 52±7.4   |
| A0A075B702                                                     | T-cell receptor alpha joining 41                                      | 360±32    | 1623±184 |
| A0A140VJI4;B4DEH1;Q3SX58;Q6P184;Q86TM7;Q9P2X0                  | Testicular tissue protein Li 58                                       | 446±114   | 1069±116 |
| A0A140VJP9;E9PSB6;Q8N9H8                                       | Testicular tissue protein Li 125                                      | 205±160   | 1.6±2.2  |
| A0A024RDC1;Q96KC9                                              | Testis development protein NYD-SP26 isoform CRA_a                     | 44.8±13.8 | 41.3±3.6 |
| A0A1W2PS94;B2RU27;D3DSV6;Q9BXT5                                | Testis-expressed protein 15                                           | 186±29    | 181±22   |
| Q96AN5                                                         | Transmembrane protein 143                                             | 13.7±1    | 51±2     |
| P68363;A0A1W2PQM2;B3KPS3;F5H5D3;Q53GA7                         | Tubulin alpha-1B chain                                                | 2764±190  | 5961±451 |
| B7ZAF0;P07437;Q5JP53;Q5SU16;B2R6L0;B7ZAK1;Q13885;Q5ST81        | Tubulin beta chain                                                    | 108±118   | 2514±353 |
| A0A024R991;Q8N8Y2                                              | V-type proton ATPase subunit                                          | 694±710   | 2545±41  |
| B2RB72;B3KMC8;O75554                                           | WW domain binding protein                                             | 1365±541  | 4185±445 |

|        |                          |        |        |
|--------|--------------------------|--------|--------|
| O60765 | Zinc finger protein 354A | 204±28 | 210±17 |
|--------|--------------------------|--------|--------|

**Table 2. Proteins identified in this work using the shaving approach**

| Accession                                                                                                       | Description                                             | Senescent cells, fmol | Control cells, fmol |
|-----------------------------------------------------------------------------------------------------------------|---------------------------------------------------------|-----------------------|---------------------|
| P62736                                                                                                          | Actin aortic smooth muscle                              | 12.2 ± 6.7            | 31.4 ± 17           |
| P60709;P60712;P63258;P63261;P62739;P63267;P68032;P68133;P68138;Q3ZC07;Q5E9B5;A5A3E0;Q6S8J3;P0CG38;P0CG39;Q9BYX7 | Actin cytoplasmic                                       | 32.5 ± 20.1           | 92.5 ± 52.9         |
| P53999                                                                                                          | Activated RNA polymerase II transcriptional coactivator | 3.5 ± 2.8             | 6.5 ± 1.3           |
| P05141;P32007;Q8SQH5                                                                                            | ADP/ATP translocase                                     | 2.4 ± 1.8             | 4.9 ± 1.2           |
| P18085;P61204;P84077;P84080;P84081;P84085;Q3SZF2;Q5E9I6                                                         | ADP-ribosylation factor                                 | 4.7 ± 3.8             | 8.4 ± 0.5           |
| P00330                                                                                                          | Alcohol dehydrogenase                                   | 101 ± 26.1            | 392.6 ± 121.1       |
| P01009                                                                                                          | Alpha-1-antitrypsin                                     | 8.2 ± 6.9             | 20.6 ± 4.2          |
| P06733;Q9XSJ4;P09104;P13929;Q3ZC09                                                                              | Alpha-enolase                                           | 9.3 ± 7.1             | 12.6 ± 1.5          |
| P04083                                                                                                          | Annexin A1                                              | 4.7 ± 3.8             | 6.7 ± 1.3           |



|                             |                                              |           |              |
|-----------------------------|----------------------------------------------|-----------|--------------|
| P07355;P04272;A6NMY6        | Annexin A2                                   | 50.3 ± 15 | 145.9 ± 37.1 |
| P08758;P81287               | Annexin A5                                   | 6.9 ± 3.8 | 3 ± 1.4      |
| P25705;P19483               | ATP synthase subunit alpha_mitochondrial     | 7.1 ± 5.6 | 1.1 ± 0.6    |
| P06576;P00829               | ATP synthase subunit beta_mitochondrial      | 7.1 ± 5.8 | 0 ± 0        |
| P48047                      | ATP synthase subunit O_mitochondrial         | 2 ± 1.6   | 0 ± 0        |
| P35613;Q865R3               | Basigin                                      | 6.1 ± 1.7 | 7 ± 3.2      |
| P80723;P80724               | Brain acid soluble protein 1                 | 3.6 ± 0.5 | 5.1 ± 1.8    |
| Q6IMN6                      | Caprin-2                                     | 5.4 ± 3.9 | 6.2 ± 1.6    |
| P16070                      | CD44 antigen                                 | 5.5 ± 2.9 | 10.8 ± 5.9   |
| O76074;Q28156               | cGMP-specific 3'_5'-cyclic phosphodiesterase | 3.3 ± 2.7 | 5.1 ± 1.1    |
| P23528;Q5E9F7;Q148F1;Q9Y281 | Cofilin-1                                    | 7 ± 5.5   | 28.3 ± 5.8   |
| Q3SZX9;Q9H0I3               | Coiled-coil domain-containing protein 113    | 8.2 ± 4.7 | 4.4 ± 0.9    |
| P00403                      | Cytochrome c oxidase subunit 2               | 2.6 ± 2.2 | 3.9 ± 0.6    |

|                                                                                                                                       |                                                                       |             |            |
|---------------------------------------------------------------------------------------------------------------------------------------|-----------------------------------------------------------------------|-------------|------------|
| P68104;Q5VTE0;Q05639;Q32PH8                                                                                                           | Elongation factor 1-alpha                                             | 21.7 ± 16   | 30.2 ± 9.9 |
| P60842;Q14240;Q3SZ54;Q3SZ65                                                                                                           | Eukaryotic initiation factor 4A-I                                     | 2.7 ± 1.9   | 1 ± 0.8    |
| P21333;O75369;Q14315                                                                                                                  | Filamin-A                                                             | 4.2 ± 0.7   | 6.7 ± 2    |
| P04406;P10096                                                                                                                         | Glyceraldehyde-3-phosphate dehydrogenase                              | 20.7 ± 11.3 | 30.9 ± 5.9 |
| P04899;A8MTJ3;P04695;P04696;P04896;P08239;<br>P08754;P09471;P0C7Q4;P11488;P19087;P38405;<br>P63092;P63096;P63097;Q03113;Q14344;Q5JWF2 | Guanine nucleotide-binding protein G(i) subunit alpha-2               | 5.2 ± 1.1   | 5.7 ± 3.5  |
| Q9UBI6;Q28024                                                                                                                         | Guanine nucleotide-binding protein G(I)/G(S)/G(O) subunit<br>gamma-12 | 3.3 ± 1.2   | 6 ± 2.8    |
| P11142;P19120;P34933;P0CB32;P0DMV8;P0DM<br>V9;P17066;P34931;P48741;Q27965;Q27975                                                      | Heat shock cognate 71 kDa protein                                     | 3.7 ± 2.5   | 4.3 ± 1.4  |
| P07900;Q76LV2                                                                                                                         | Heat shock protein HSP 90-alpha                                       | 2.1 ± 1.5   | 3.6 ± 0.4  |
| P08238;Q76LV1;Q58FF7;Q14568;Q58FF6;Q58F<br>F8;Q12931;Q2TBI4;Q58FG0                                                                    | Heat shock protein HSP 90-beta                                        | 7.8 ± 4.6   | 12.8 ± 0.6 |
| P61603;P61604                                                                                                                         | 10 kDa heat shock protein_ mitochondrial                              | 6.8 ± 5.5   | 7.1 ± 2.8  |
| P10809;P31081                                                                                                                         | 60 kDa heat shock protein_ mitochondrial                              | 5.1 ± 4.1   | 1.4 ± 0.8  |
| P04908;P0C0S8;P0C0S9;P20671;Q16777;Q3ZBX<br>9;Q6F113;Q7L7L0;Q93077;Q96KK5;Q99878;Q9<br>BTM1;P0C0S4;P0C0S5;P16104;Q32LA7;Q71UI9        | Histone H2A type 2-C                                                  | 17.2 ± 14   | 0.1 ± 0.1  |

|                                                                                                                                                                                                                                                                                                                                                                                    |                                                         |            |            |
|------------------------------------------------------------------------------------------------------------------------------------------------------------------------------------------------------------------------------------------------------------------------------------------------------------------------------------------------------------------------------------|---------------------------------------------------------|------------|------------|
| ;Q8IUE6;Q96QV6                                                                                                                                                                                                                                                                                                                                                                     |                                                         |            |            |
| O60814;P06899;P23527;P33778;P58876;P62807;P62808;Q16778;Q2M2T1;Q32L48;Q5QNW6;Q93079;Q99877;Q99879;P57053;Q96A08;Q99880;Q8N257                                                                                                                                                                                                                                                      | Histone H2B type 1-B                                    | 19 ± 15.2  | 1.7 ± 1.1  |
| Q16695;A5PK61;P68431;P68432;P84227;P84243;Q5E9F8;Q71DI3;Q6NXT2;Q3SZB8                                                                                                                                                                                                                                                                                                              | Histone H3.1t                                           | 19.2 ± 8.9 | 18.8 ± 4.8 |
| P62803;P62805                                                                                                                                                                                                                                                                                                                                                                      | Histone H4                                              | 10.3 ± 8.4 | 1 ± 0.8    |
| P01889;P01893;P03989;P04222;P04439;P05534;P10319;P13746;P13747;P16188;P17693;P18463;P18464;P18465;P30443;P30447;P30455;P30460;P30461;P30462;P30464;P30466;P30475;P30479;P30480;P30481;P30483;P30484;P30485;P30487;P30488;P30490;P30491;P30492;P30493;P30495;P30498;P30501;P30504;P30505;P30508;P30510;P30685;Q04826;Q07000;Q29718;Q29836;Q29865;Q29940;Q29960;Q29963;Q95365;Q9TNN7 | HLA class I histocompatibility antigen_ B-7 alpha chain | 5.2 ± 2.4  | 1.9 ± 0.6  |
| F1MMS9;P26006                                                                                                                                                                                                                                                                                                                                                                      | Integrin alpha-3                                        | 5.6 ± 0.7  | 6.5 ± 1.8  |
| P05556                                                                                                                                                                                                                                                                                                                                                                             | Integrin beta-1                                         | 3.4 ± 0.5  | 6.9 ± 0.9  |
| P18564;Q8SQB8                                                                                                                                                                                                                                                                                                                                                                      | Integrin beta-6                                         | 6.2 ± 1.2  | 8.7 ± 0.8  |

|                                                         |                                                            |             |             |
|---------------------------------------------------------|------------------------------------------------------------|-------------|-------------|
| P00338;P19858;Q5E9B1                                    | L-lactate dehydrogenase A chain                            | 10 ± 7      | 19.1 ± 3.5  |
| Q9UPN3                                                  | Microtubule-actin cross-linking factor 1_ isoforms 1/2/3/5 | 19 ± 3.5    | 36.6 ± 3.8  |
| P35579                                                  | Myosin-9                                                   | 2.9 ± 2.2   | 8.2 ± 3.5   |
| P14649;P60660;P60661                                    | Myosin light chain 6B                                      | 6.3 ± 3.6   | 11.5 ± 3.6  |
| A4IF97;O14950;P19105;Q5E9E2                             | Myosin regulatory light chain 12B                          | 2.8 ± 1.9   | 4.9 ± 1.6   |
| Q09666                                                  | Neuroblast differentiation-associated protein AHNAK        | 4.2 ± 3.4   | 34.7 ± 10.9 |
| P21589                                                  | 5'-Nucleotidase                                            | 1.7 ± 1.4   | 2.5 ± 0.7   |
| P62937;P62935                                           | Peptidyl-prolyl cis-trans isomerase A                      | 3.2 ± 2.6   | 6.4 ± 1.9   |
| Q06830;Q5E947;P32119                                    | Peroxiredoxin-1                                            | 10.4 ± 8    | 21.1 ± 4.8  |
| P12234;Q00325                                           | Phosphate carrier protein_ mitochondrial                   | 5.2 ± 4.2   | 0           |
| Q5VZY2                                                  | Phospholipid phosphatase 4                                 | 4 ± 3.3     | 3.7 ± 1.7   |
| P0CG47;P0CG48;P0CG53;P0CH28;P62979;P62987;P62992;P63048 | Polyubiquitin-B                                            | 14.9 ± 11.9 | 20.4 ± 5.5  |
| Q5H9U9                                                  | Probable ATP-dependent RNA helicase DDX60-like             | 8.7 ± 6.7   | 8.5 ± 3.5   |

|                                           |                                                   |             |             |
|-------------------------------------------|---------------------------------------------------|-------------|-------------|
| P07737;P02584                             | Profilin-1                                        | 7.1 ± 5.3   | 15.4 ± 2.7  |
| Q9Y2J8                                    | Protein-arginine deiminase type-2                 | 3.2 ± 2.6   | 0.3 ± 0.3   |
| P06703                                    | Protein S100-A6                                   | 30.7 ± 24.4 | 37.1 ± 12.1 |
| P31949                                    | Protein S100-A11                                  | 16.7 ± 13.2 | 27.5 ± 3.5  |
| P63103;P63104;P27348;P31946;P68250;Q3SZI4 | 14-3-3 protein zeta/delta                         | 6.8 ± 3     | 9.8 ± 1     |
| Q5E9U1                                    | P2X purinoceptor 4                                | 3.3 ± 2.7   | 0           |
| O60361;P15531;P22392;P52174;P52175;Q3T0Q4 | Putative nucleoside diphosphate kinase            | 3.2 ± 2.6   | 4.5 ± 1.1   |
| P14618;P30613                             | Pyruvate kinase PKM                               | 14.5 ± 8.9  | 18.9 ± 1.3  |
| Q8NFH8                                    | RalBP1-associated Eps domain-containing protein 2 | 1.8 ± 1.5   | 2.1 ± 0.4   |
| P46940                                    | Ras GTPase-activating-like protein IQGAP1         | 2.2 ± 1.8   | 5.6 ± 2.7   |
| P23396;Q3T169                             | 40S ribosomal protein S3                          | 2.2 ± 1.8   | 0.6 ± 0.2   |
| P62263                                    | 40S ribosomal protein S14                         | 3.2 ± 2.6   | 4.8 ± 0.6   |
| P62851;Q56JX5                             | 40S ribosomal protein S25                         | 3.8 ± 3.1   | 5.1 ± 1.3   |

|               |                                                                                  |             |              |
|---------------|----------------------------------------------------------------------------------|-------------|--------------|
| P36578;Q58DW0 | 60S ribosomal protein L4                                                         | 2.9 ± 2.4   | 3.9 ± 0.9    |
| P18124;Q58DT1 | 60S ribosomal protein L7                                                         | 3.8 ± 2.9   | 5.2 ± 1.6    |
| P62913;Q3T087 | 60S ribosomal protein L11                                                        | 3 ± 2.4     | 4.1 ± 0.9    |
| P30050;P61284 | 60S ribosomal protein L12                                                        | 2.3 ± 1.9   | 2.3 ± 0.9    |
| P35268        | 60S ribosomal protein L22                                                        | 2.3 ± 1.5   | 3.3 ± 0.6    |
| P02769        | Serum albumin                                                                    | 3.6 ± 3     | 8.6 ± 5.1    |
| Q04837        | Single-stranded DNA-binding protein_ mitochondrial                               | 2.7 ± 2.1   | 0.3 ± 0.3    |
| Q14524        | Sodium channel protein type 5 subunit alpha                                      | 14.9 ± 10   | 25.6 ± 8.8   |
| P38646;Q3ZCH0 | Stress-70 protein_ mitochondrial                                                 | 2.6 ± 2.1   | 0            |
| A6NHR9        | Structural maintenance of chromosomes flexible hinge domain-containing protein 1 | 10.7 ± 8.6  | 15.8 ± 1.1   |
| Q9Y6N5        | Sulfide:quinone oxidoreductase_ mitochondrial                                    | 1.8 ± 1.4   | 0.4 ± 0.5    |
| Q99536        | Synaptic vesicle membrane protein VAT-1 homolog                                  | 3 ± 2.5     | 3.5 ± 0.3    |
| Q9Y4F4        | TOG array regulator of axonemal microtubules protein 1                           | 105.6 ± 3.6 | 381.5 ± 12.8 |

|                                                                                                   |                                                     |             |             |
|---------------------------------------------------------------------------------------------------|-----------------------------------------------------|-------------|-------------|
| Q32PH0;Q96Q05                                                                                     | Trafficking protein particle complex subunit 9      | 86.3 ± 29.5 | 77.2 ± 23.1 |
| Q2KJJ5                                                                                            | Transducin beta-like protein 3                      | 13.6 ± 2.6  | 80.8 ± 6.4  |
| Q9H2D6                                                                                            | TRIO and F-actin-binding protein                    | 74.5 ± 59   | 18.7 ± 0.8  |
| O15016                                                                                            | Tripartite motif-containing protein 66              | 4.9 ± 2.1   | 39.3 ± 3.4  |
| P68363;P81947;Q2HJ86;Q3ZCJ7;Q71U36;Q9BQE3;Q13748;Q32KN8;P68366;P81948;Q6PEY2;Q2HJB8;Q9NY65;A6NHL2 | Tubulin alpha-1B chain                              | 18.2 ± 6.9  | 16.9 ± 5.1  |
| P07437;Q2KJD0;Q13885;Q6B856;Q9BVA1;Q13509;Q2T9S0;Q2HJ81;A6NNZ2;Q9BUF5;Q9H4B7                      | Tubulin beta chain                                  | 9.7 ± 7.4   | 8.9 ± 3.2   |
| P68371;Q3MHM5;P04350;Q3ZBU7;Q3ZCM7                                                                | Tubulin beta-4B chain                               | 2.2 ± 1.7   | 1.9 ± 0.9   |
| P08670;P48616;P17661;O62654                                                                       | Vimentin                                            | 3.2 ± 2.6   | 0.6 ± 0.4   |
| P18206                                                                                            | Vinculin                                            | 2.1 ± 1.7   | 3.2 ± 0.5   |
| P21796;P45879                                                                                     | Voltage-dependent anion-selective channel protein 1 | 4 ± 3.1     | 0.2 ± 0.2   |
| P45880;P68002                                                                                     | Voltage-dependent anion-selective channel protein 2 | 5 ± 3.8     | 0.5 ± 0.5   |
| Q5SXM1                                                                                            | Zinc finger protein 678                             | 3.3 ± 2.6   | 4.1 ± 2.4   |
